# Supplementary material
Source: PubMed Central journal article supplement (PMC7370240)
Supplement: NIHMS1577774-supplement-1.pdf [file NIHMS1577774-supplement-1.pdf]

*Supplementary Information*

**Highly parallel profiling of Cas9 variant specificity**

Jonathan L. Schmid-Burgk<sup>1,2,3,4,5</sup>, Linyi Gao<sup>1,2,3,4,5</sup>, David Li<sup>1,2,3,4,5</sup>, Zachary Gardner<sup>1,2,3,4</sup>, Jonathan Strecker<sup>1,2,3,4</sup>, Blake Lash<sup>1,2,3,4</sup>, Feng Zhang<sup>1,2,3,4,5,6,7,\*</sup>

<sup>1</sup> Broad Institute of MIT and Harvard  
Cambridge, MA 02142, USA

<sup>2</sup> McGovern Institute for Brain Research

<sup>3</sup> Department of Brain and Cognitive Sciences

<sup>4</sup> Department of Biological Engineering  
Massachusetts Institute of Technology, Cambridge, MA 02139, USA

<sup>5</sup> These authors contributed equally

<sup>6</sup> Howard Hughes Medical Institute, Cambridge, MA 02139, USA

<sup>7</sup> Lead Contact

\*Correspondence should be addressed to F.Z. ([zhang@broadinstitute.org](mailto:zhang@broadinstitute.org))

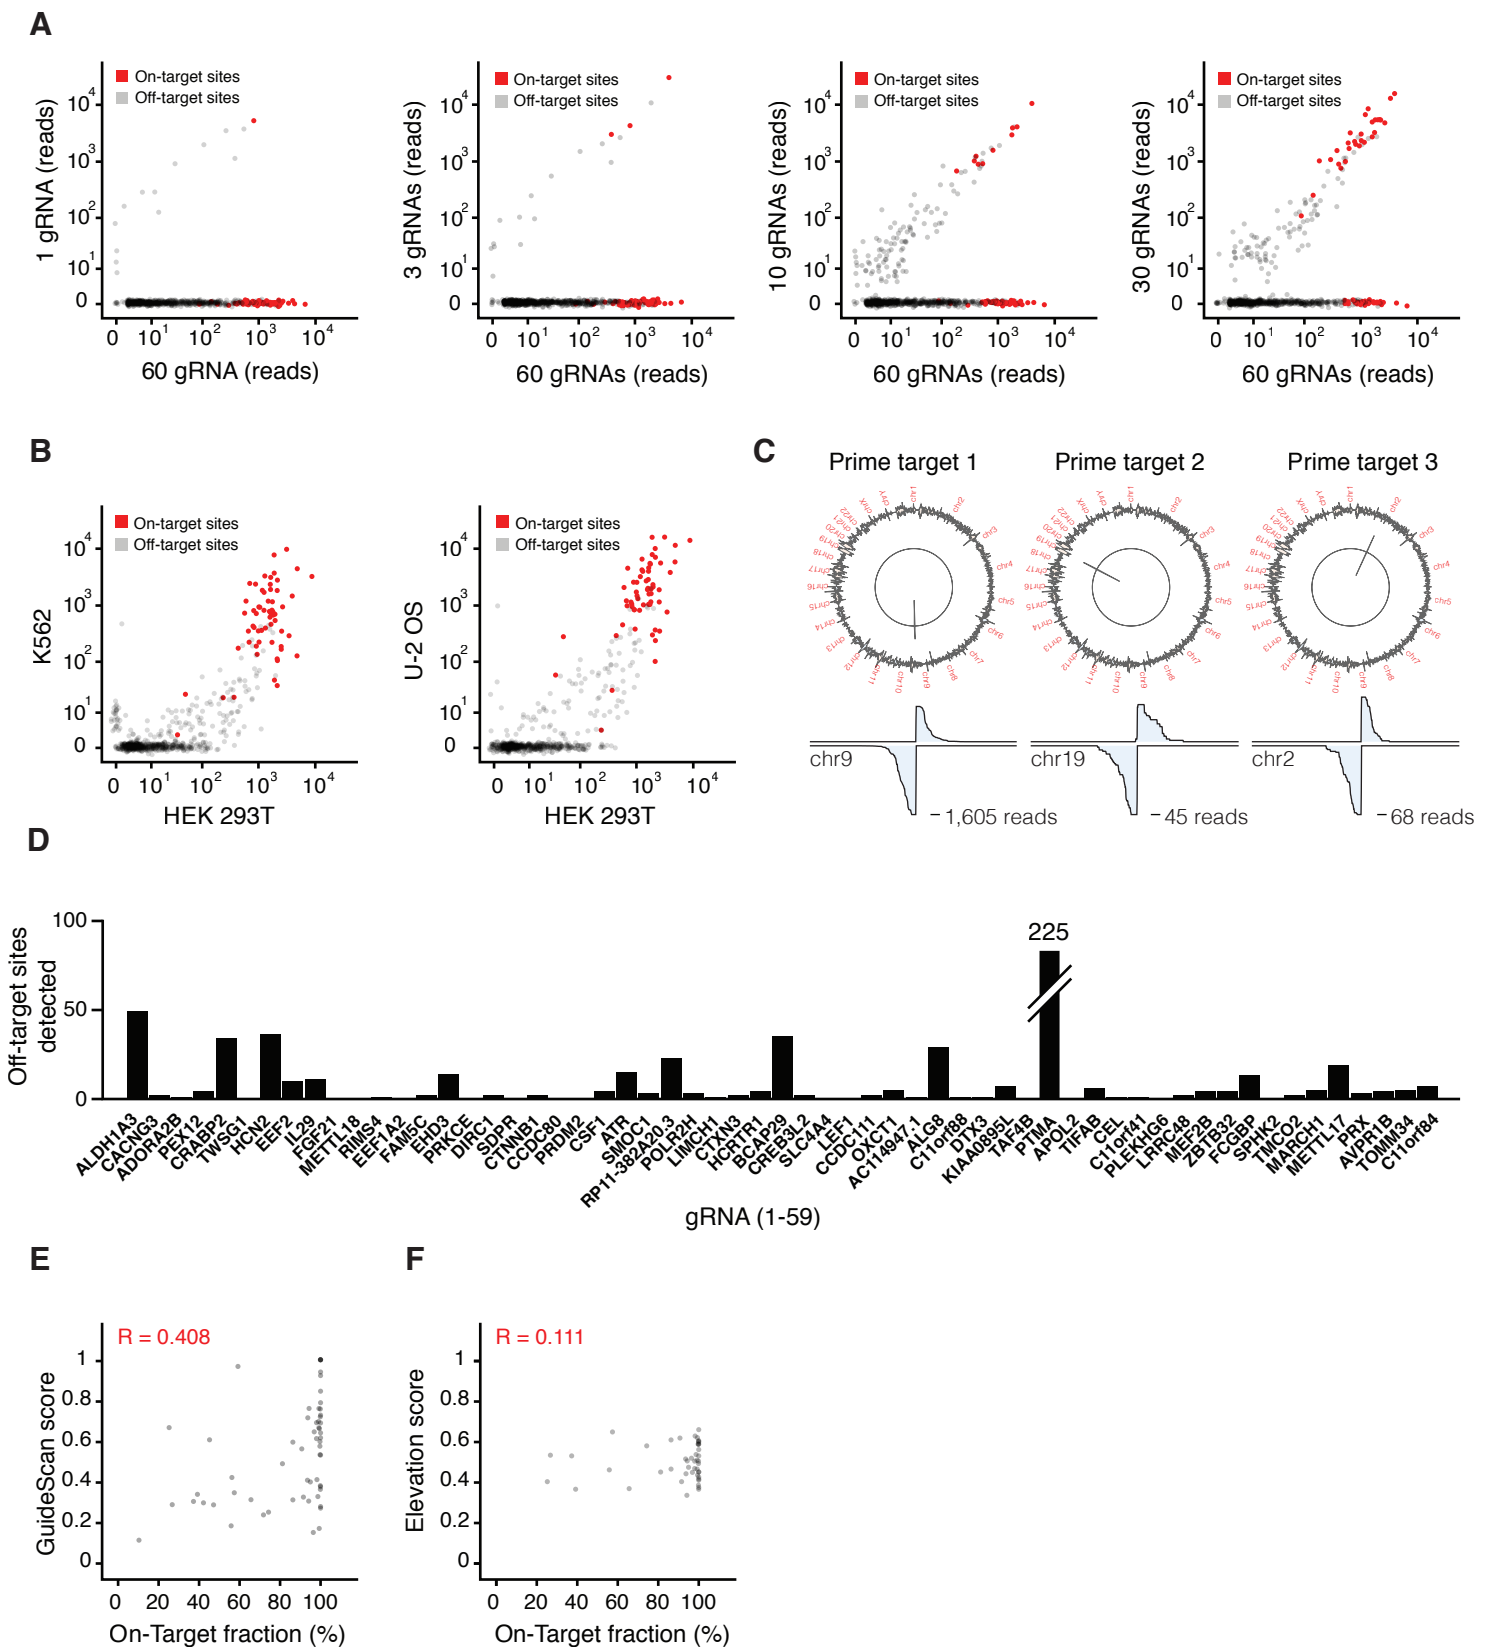

**Supplemental Figure 1 | Extended validation and application of TTISS, Related to Figure 1 (A)**  
 TTISS results for multiplexing of 1, 3, 10, 30, and 60 gRNAs. The number of reads for each detected genomic locus is plotted. On-target sites are marked in red. **(B)** Quantitative TTISS results from three cell lines using 59 guides. **(C)** Detection of donor integration sites using prime editing targeting three genomic loci in HEK 293T cells. Spacer and extension sequences are provided in Supplemental Table 3. **(D)** Distribution of off-target sites per gRNA across 59 gRNAs detected by TTISS using WT SpCas9. **(E)** Comparison of GuideScan-predicted specificity scores to TTISS measured on-target fractions for 59 guides. **(F)** Comparison of Elevation specificity scores to TTISS measured on-target fractions for 47 guides which could be scored by the CRISPR ML online interface.

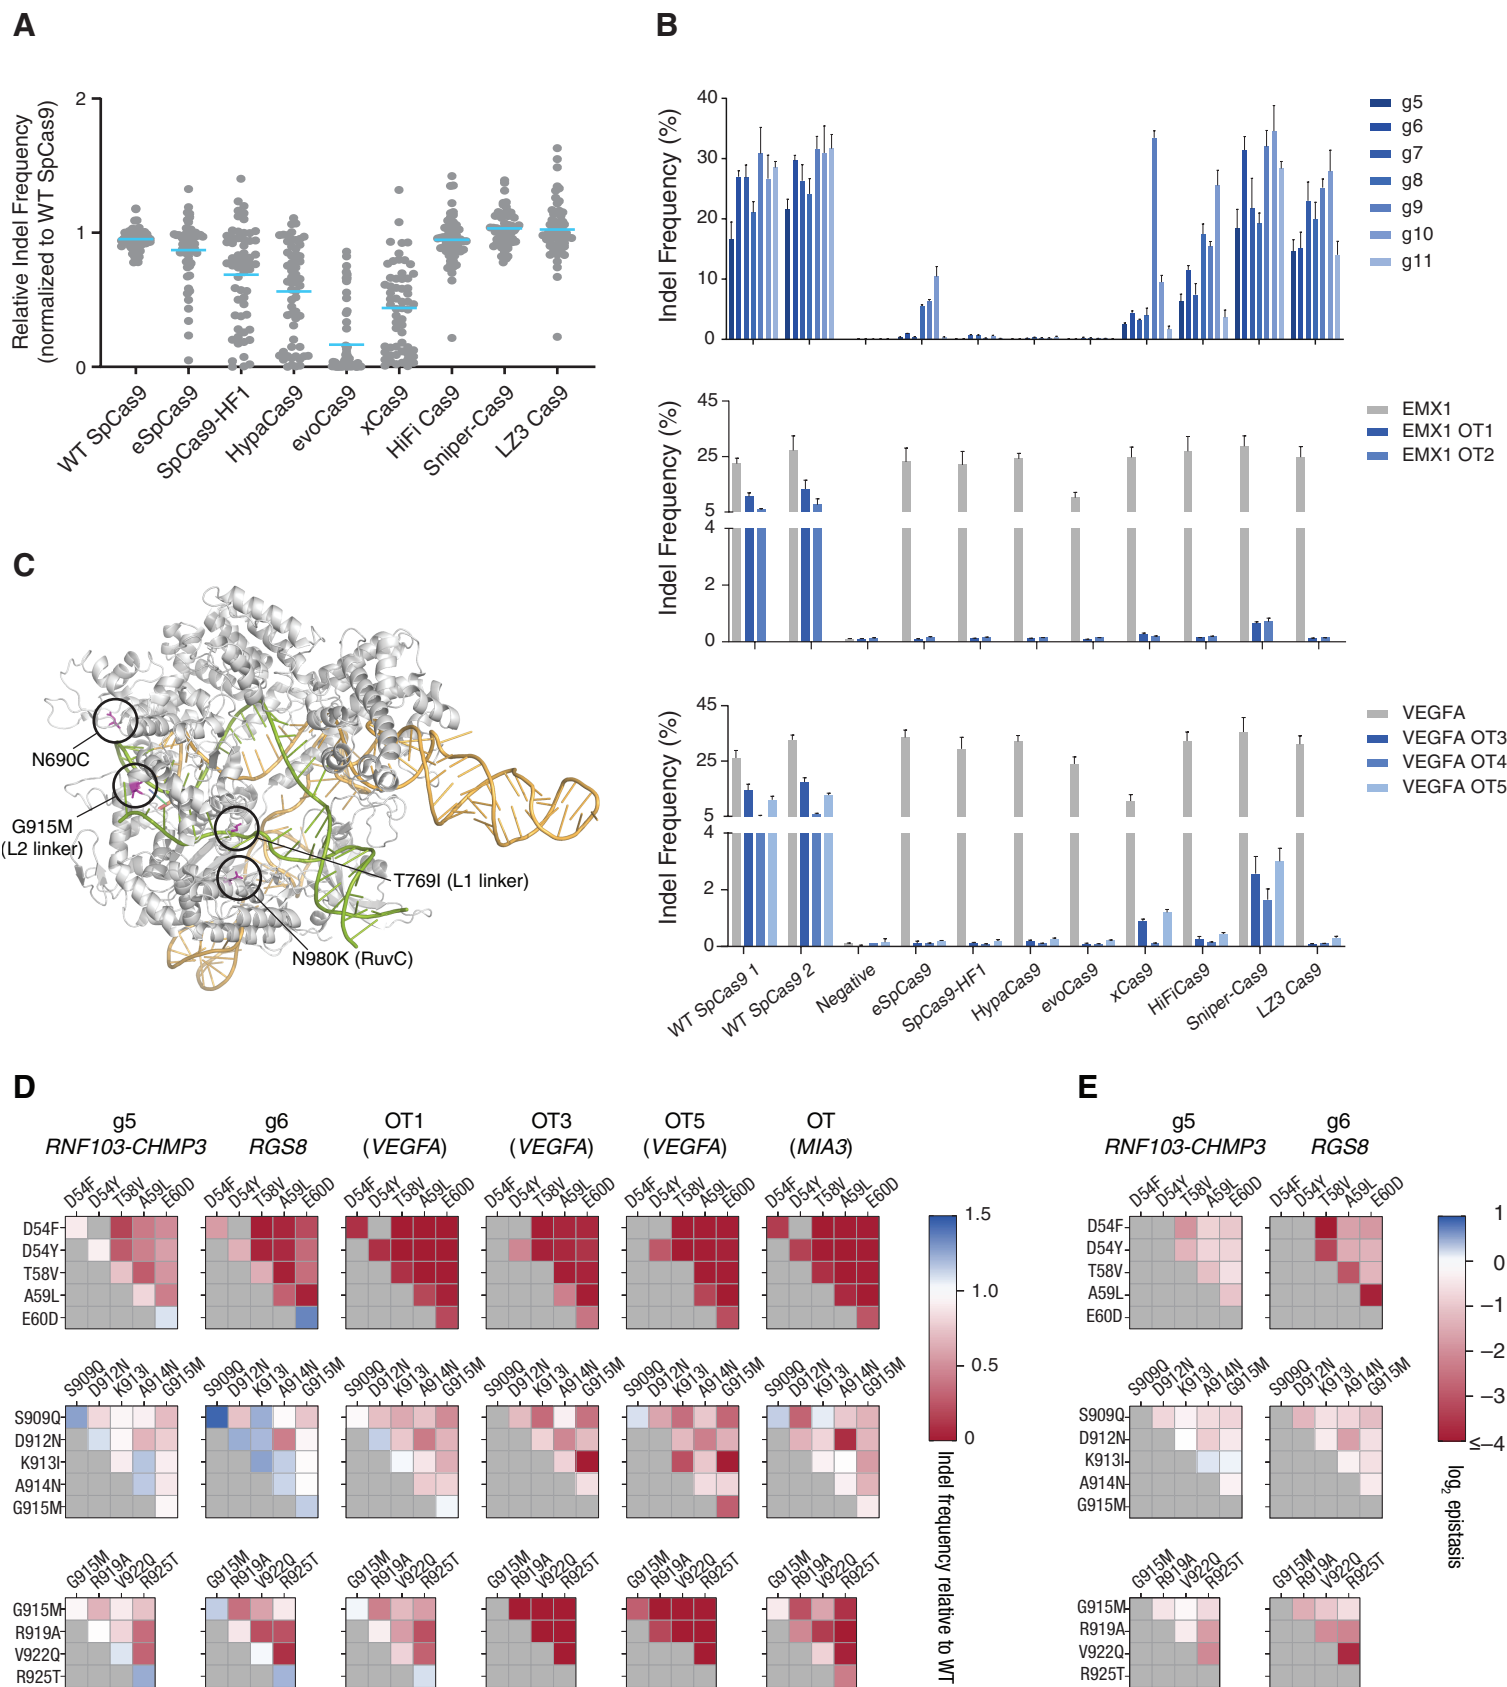

**Supplemental Figure 2 | On-target and off-target activity of selected SpCas9 variants, Related to Figures 1 and 2.** All indel frequencies were quantified by targeted deep sequencing. **(A)** Normalized indel frequencies for 59 target sites for WT, LZ3 Cas9, and seven previously reported SpCas9 specificity-enhancing variants. Each dot represents a different guide (mean of  $n = 2$  replicates). The teal lines show the median activity for each Cas9 variant. Target sites were selected from the GeCKO library (Shalem et al. Science 2014), each targeting a different gene, without prior knowledge of activity. **(B)** Activity of SpCas9 variants at additional on-target and off-target sites. Guides g5-g11 were selected based on prior knowledge of low activity for eSpCas9(1.1) and SpCas9-HF1. **(C)** Crystal structure of SpCas9 (PDB ID: 5F9R) showing the position of the four mutations in LZ3. **(D)** Activity of double mutants of selected specificity-enhancing single mutants. **(E)** Epistasis plots of the variants in (D) for guides g1 and g2, where epistasis was calculated as  $f_{AB}/(f_A \times f_B)$ , where  $f_{AB}$  is the normalized indel frequency of the double mutant, and  $f_A$  and  $f_B$  are the normalized indel frequencies of the corresponding single mutants.

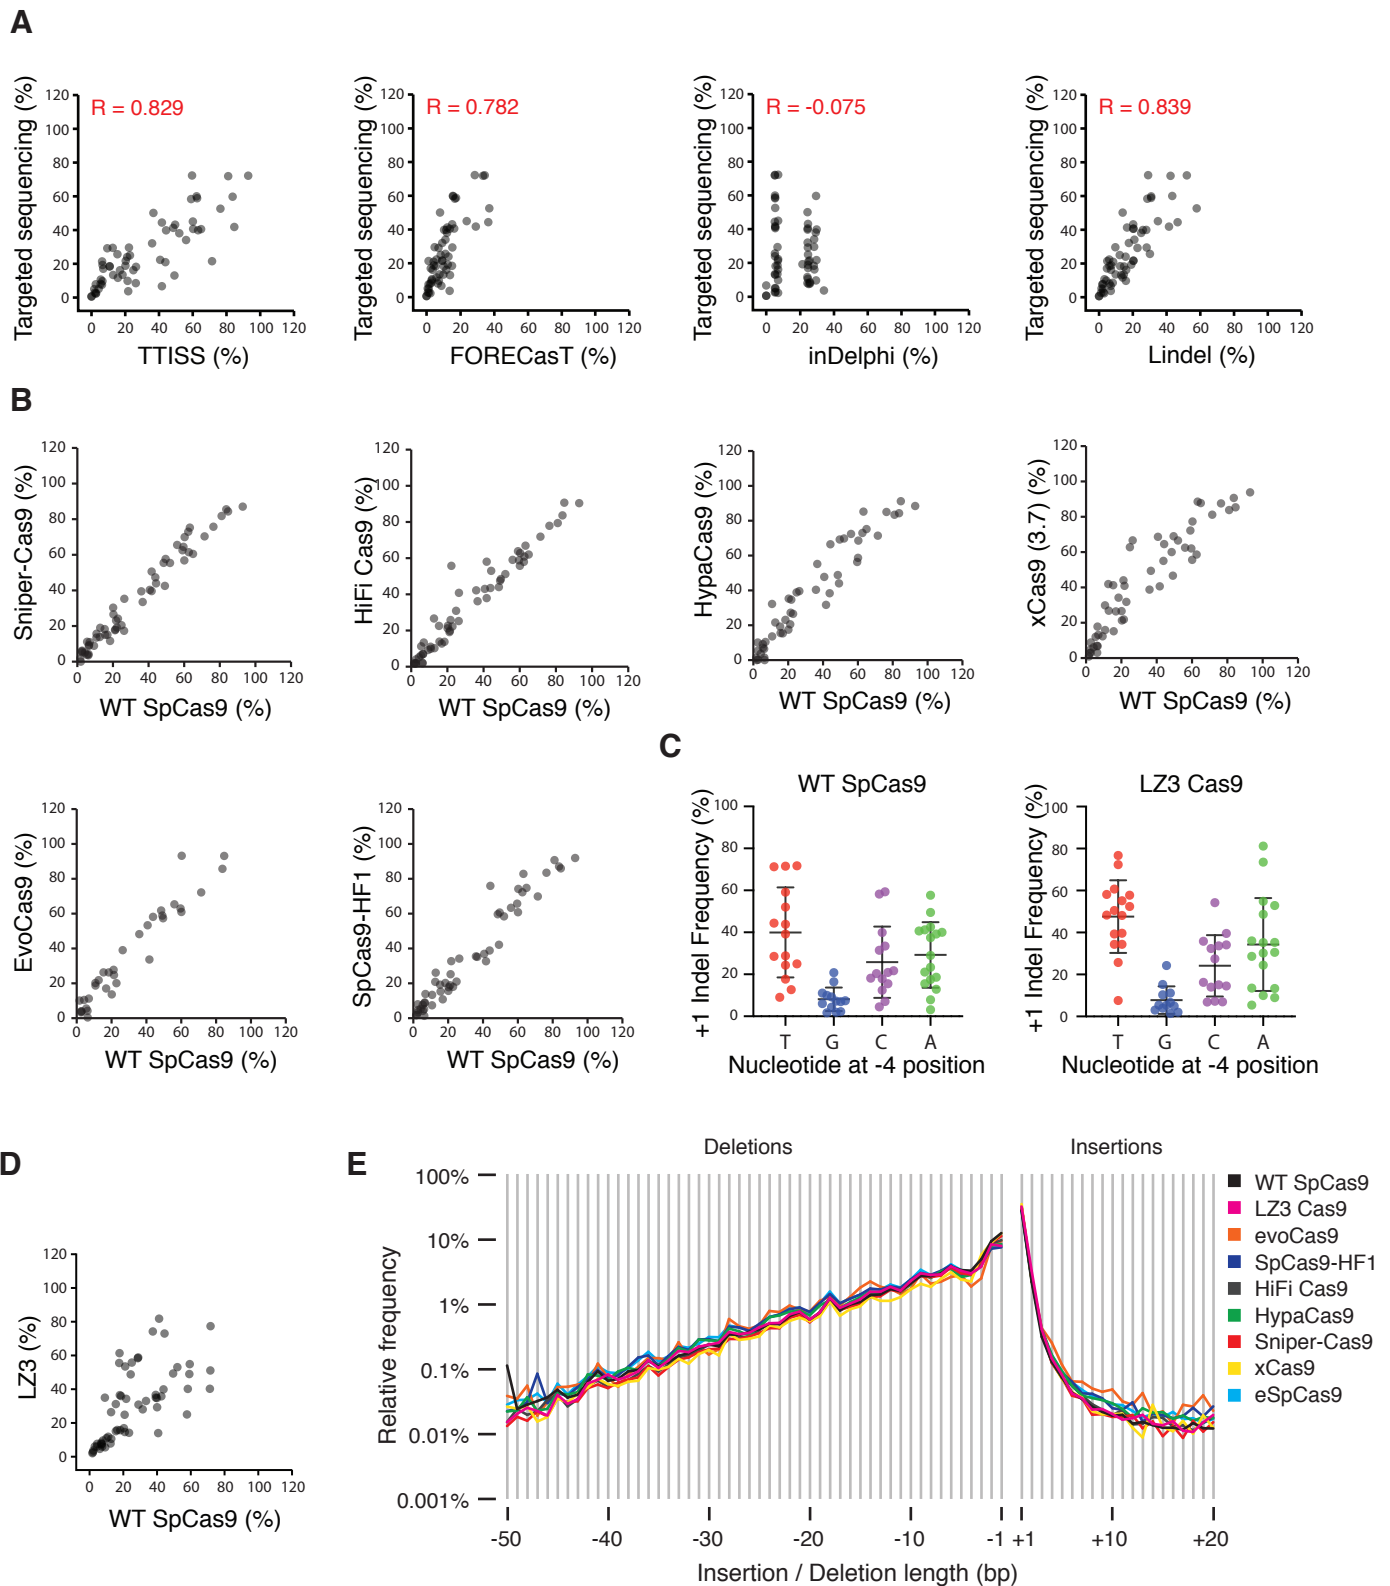

**Supplemental Figure 3 | Extended assessment of +1 indel frequencies using TTISS, Related to Figure 3. (A)**

+1 insertion frequencies measured by TTISS or predicted by FORECasT, inDelphi, or Lindel are correlated to +1 frequencies measured by targeted indel sequencing for WT SpCas9 across 58 gRNAs. **(B)** TTISS-predicted +1 frequencies for SpCas9 variants calculated for 58 gRNAs plotted against TTISS-predicted +1 frequencies for WT SpCas9. **(C)** +1 indel frequencies measured by targeted sequencing for WT SpCas9 and LZ3 Cas9 across 59 guides, grouped by the nucleotide identity at the -4 position relative to the PAM. **(D)** Plot of +1 frequencies for LZ3 against +1 frequencies for WT SpCas9 as measured by targeted sequencing for 59 gRNAs. **(E)** Insertion and deletion length distributions of Cas9 variants across 59 guides from targeted sequencing. Indel length frequencies relative to total indels are shown on logarithmic scale.
